# Supplementary material
Source: PubMed Central journal article supplement (PMC3556225)
Supplement: NIHMS405098-supplement-01.pdf [file NIHMS405098-supplement-01.pdf]

**A**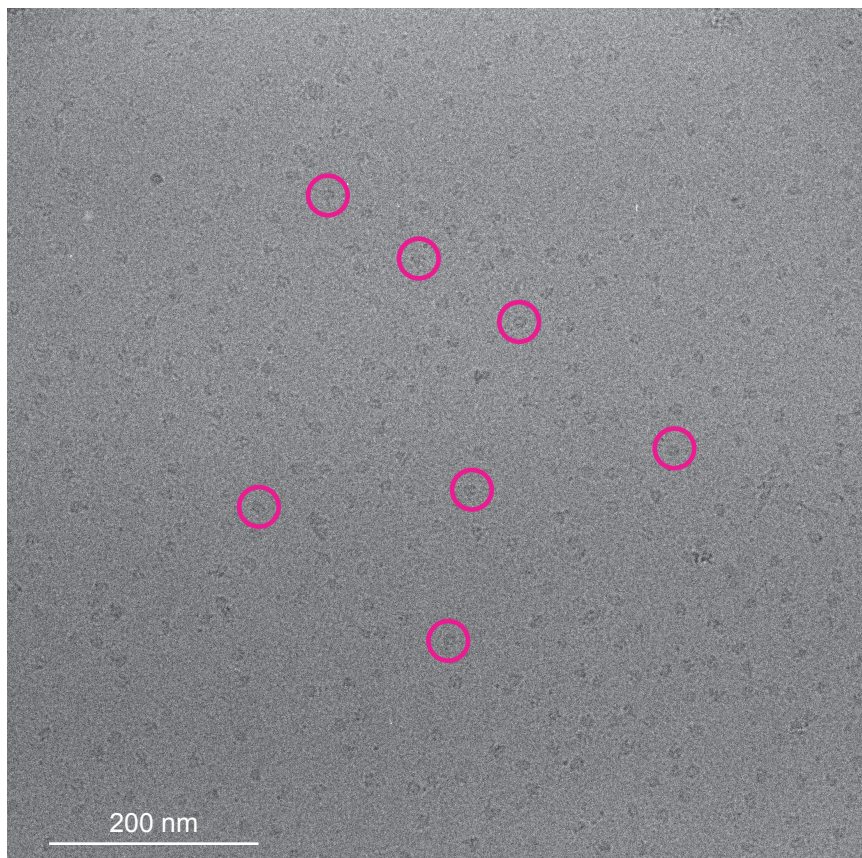**B**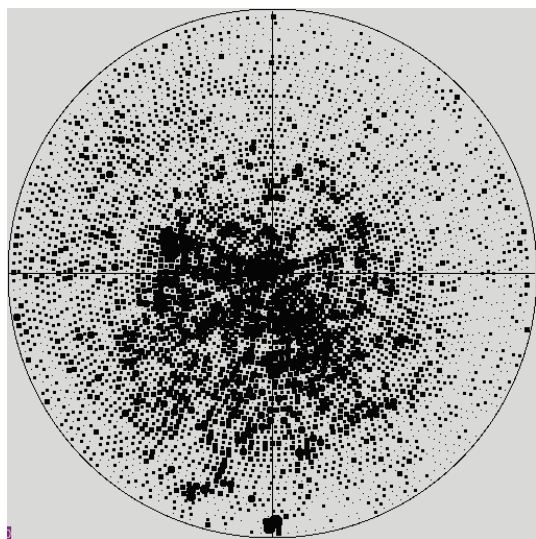**C**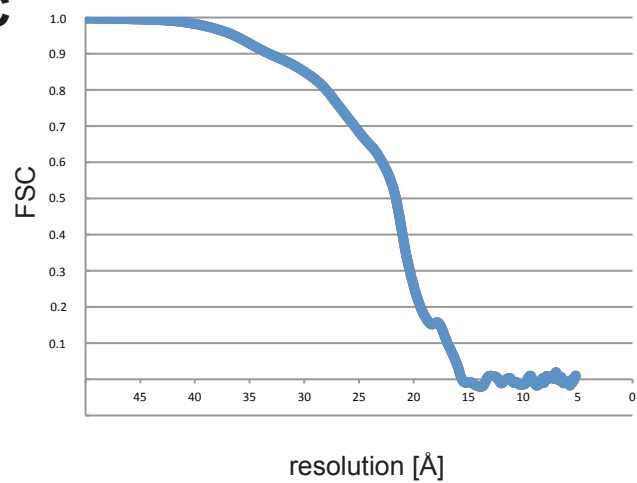

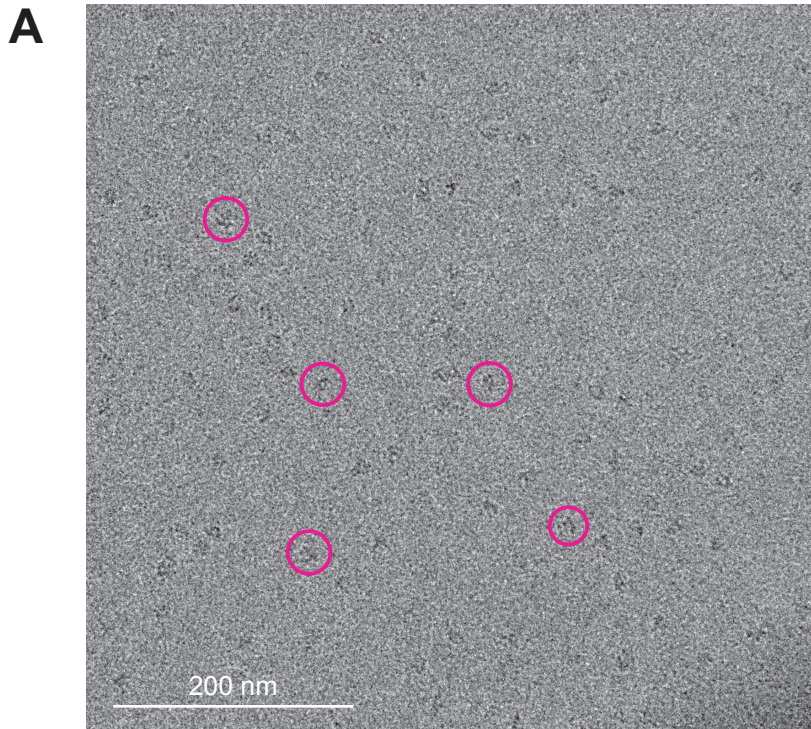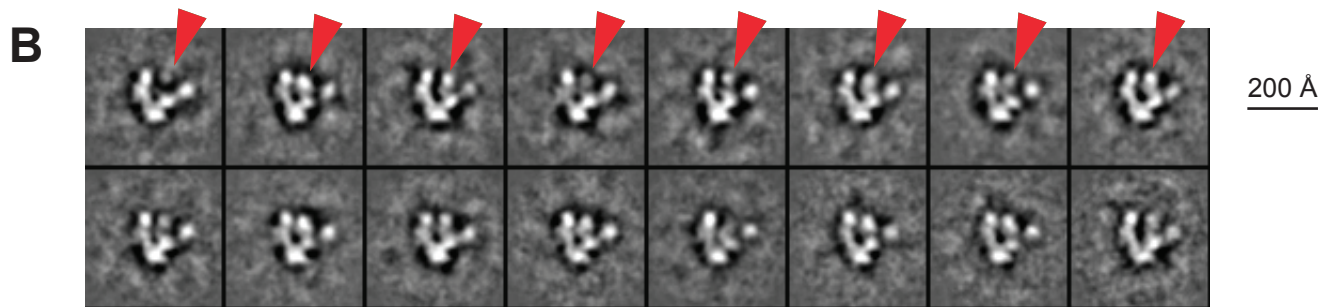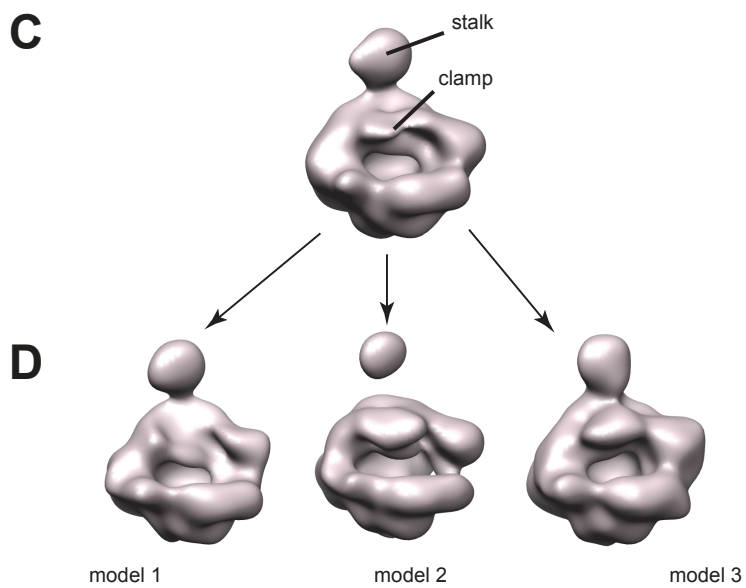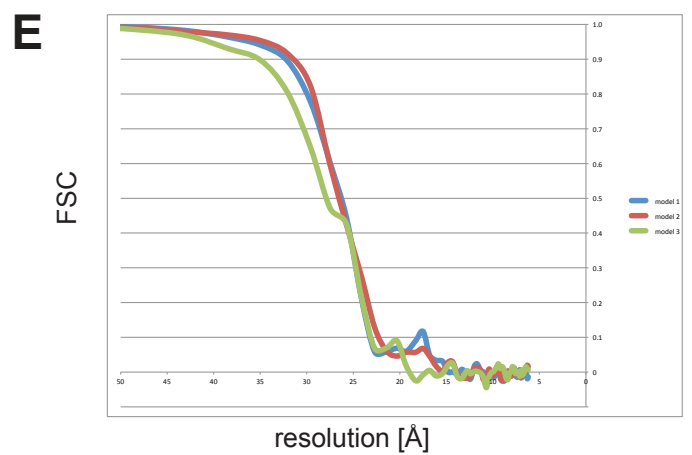

Supplementary Figure 2, Kassube et al., 2012

## **SUPPLEMENTARY FIGURE CAPTIONS**

### **Supplementary Figure 1. Cryo-EM analysis of the hPol II / scAlu complex.**

- (A) Cryo-EM micrograph of the hPol II / scAlu complex. Particles in the center of the micrograph are highlighted with pink circles.
- (B) Angular distribution.
- (C) Fourier shell correlation curve.

### **Supplementary Figure 2. Cryo-EM analysis of the apo hPol II complex.**

- (A) Cryo-EM micrograph of the apo hPol II complex. Particles are highlighted with pink circles.
- (B) Reference free 2D class averages. Arrowheads in the upper row point at flexible elements. (The images were binned to a final pixel size of  $\sim 6$  Å for the 2D classification step).
- (C) Reconstruction of apo hPol II. In comparison with the ncRNA-bound structures, the clamp is less well defined due to unresolved flexibility.
- (D) Coexisting clamp conformations of apo hPol II.
- (E) Fourier shell correlation curves.
